# Supplementary material for: Sex differences in neural projections of fear memory processing in mice and humans
Source: PubMed Central journal article supplement — Sci Adv. 2024 Jul 10;10(28):eadk3365. doi: 10.1126/sciadv.adk3365 (PMC11235172; doi:10.1126/sciadv.adk3365), 2024-07-10
Supplement: sciadv.adk3365_sm.pdf [file sciadv.adk3365_sm.pdf]

Supplementary Materials for  
**Sex differences in neural projections of fear memory processing in mice  
and humans**

Antonio Florido *et al.*

Corresponding author: Raúl Andero, [raul.andero@uab.cat](mailto:raul.andero@uab.cat)

*Sci. Adv.* **10**, eadk3365  
DOI: 10.1126/sciadv.adk3365

**The PDF file includes:**

Figs. S1 to S10  
Tables S1 to S7  
Legend for data S1  
Legend for movie S1

**Other Supplementary Material for this manuscript includes the following:**

Data S1  
Movie S1

| Abbreviation     | Full name                                                                        |
|------------------|----------------------------------------------------------------------------------|
| Cg               | cingulate cortex                                                                 |
| PrL              | prelimbic cortex                                                                 |
| IL               | infralimbic cortex                                                               |
| aca              | anterior commissure, anterior part                                               |
| cc               | corpus callosum                                                                  |
| LSV              | lateral septal nucleus, ventral part                                             |
| STMV             | medial nucleus of the stria terminalis, medial division, ventral part            |
| STLV             | medial nucleus of the stria terminalis, lateral division, ventral part           |
| STMA             | medial nucleus of the stria terminalis, medial division, anterior part           |
| STMAL            | medial nucleus of the stria terminalis, medial division, anterolateral part      |
| STMPM            | medial nucleus of the stria terminalis, medial division, posteromedial part      |
| STMPI            | medial nucleus of the stria terminalis, medial division posterointermediate part |
| STMPL            | medial nucleus of the stria terminalis, medial division, posterolateral part     |
| STPL (or BNSTpl) | medial nucleus of the stria terminalis, lateral division, posterior part         |
| CPU              | caudate putamen (striatum)                                                       |
| VP               | ventral pallidum                                                                 |
| lc               | internal capsule                                                                 |
| BLA              | basolateral amygdaloid nucleus, anterior part                                    |
| BMA              | basomedial amygdaloid nucleus, anterior part                                     |
| CeC              | central amygdaloid nucleus, capsular part                                        |
| CeL              | central amygdaloid nucleus, lateral division                                     |
| CeM              | central amygdaloid nucleus, medial division or centro-medial amygdala            |
| MeA              | medial amygdaloid nucleus, anterior part                                         |
| VEn              | ventral endopiriform claustrum,                                                  |
| ArcL             | arcuate hypothalamic nucleus, lateral part                                       |
| IPAC             | interstitial nucleus of the posterior limb of the anterior commissure            |
| ArcM             | arcuate hypothalamic nucleus, medial part                                        |
| MoDG             | molecular layer of the dentate gyrus                                             |
| ArcDM            | arcuate hypothalamic nucleus, dorsomedial part                                   |
| ArcLP            | arcuate hypothalamic nucleus, lateral posterior part                             |
| ArcMP            | arcuate hypothalamic nucleus, medial posterior part                              |

|       |                                               |
|-------|-----------------------------------------------|
| ME    | median eminence                               |
| SHy   | septohypothalamic nucleus                     |
| LH    | lateral hypothalamic area                     |
| PLH   | peduncular part of lateral hypothalamus       |
| CA1   | field CA1 of the hippocampus                  |
| VMH   | ventromedial hypothalamic nucleus             |
| CA2   | field CA2 of the hippocampus                  |
| CA3   | field CA3 of the hippocampus                  |
| GrDG  | granule cell layer of the dentate gyrus       |
| LMol  | lacunosum moleculare layer of the hippocampus |
| Py    | pyramidal cell layer of the hippocampus       |
| alv   | alveus of the hippocampus                     |
| DMPAG | dorsomedial periaqueductal gray               |
| DLPAG | dorsolateral periaqueductal gray              |
| LPAG  | lateral periaqueductal gray                   |
| VLPAG | ventrolateral periaqueductal gray             |

**Table S1. Abbreviations for brain structures in the mouse brain according to Paxinos brain atlas.**

This table contains all the abbreviations of anatomical brain regions in the mouse brain used in the text.

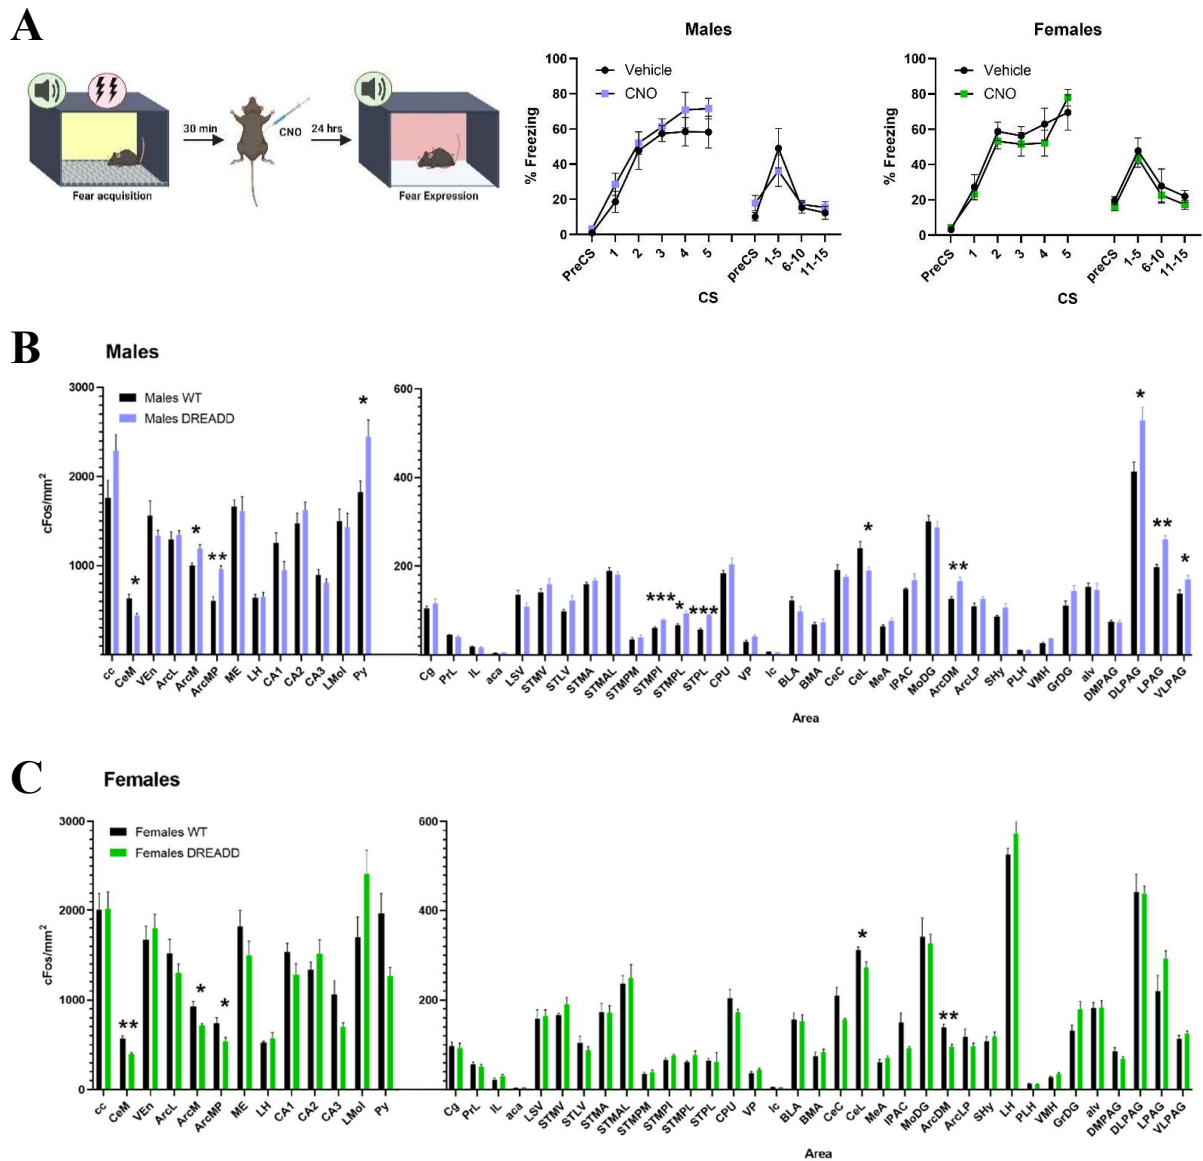

**Fig. S1. Regulation of cFos density across the brain after chemogenetic silencing of CeM-*Tac2* neurons and CNO controls.**

(A) Control experiments with wild-type mice show that CNO given systemically does not change fear memory consolidation in males or females. Images representing the experiment were created with BioRender.com. (B) cFos positive neurons by mm<sup>2</sup> in wild-type male mice and heterozygous *Tac2*-cre mice expressing hM4Di(Gq) in CeM-*Tac2* neurons and receiving CNO 30 minutes after fear conditioning; (C) wild-type female mice and heterozygous *Tac2*-cre female mice expression hM4Di(Gq) in CeM-*Tac2* neurons and receiving CNO 30 minutes after fear conditioning. Data are shown as Mean  $\pm$  SEM and analyzed using ANOVA repeated measures or two-tailed t-tests. \**p* < 0.05; \*\* *p* < 0.01; \*\*\* *p* < 0.001.

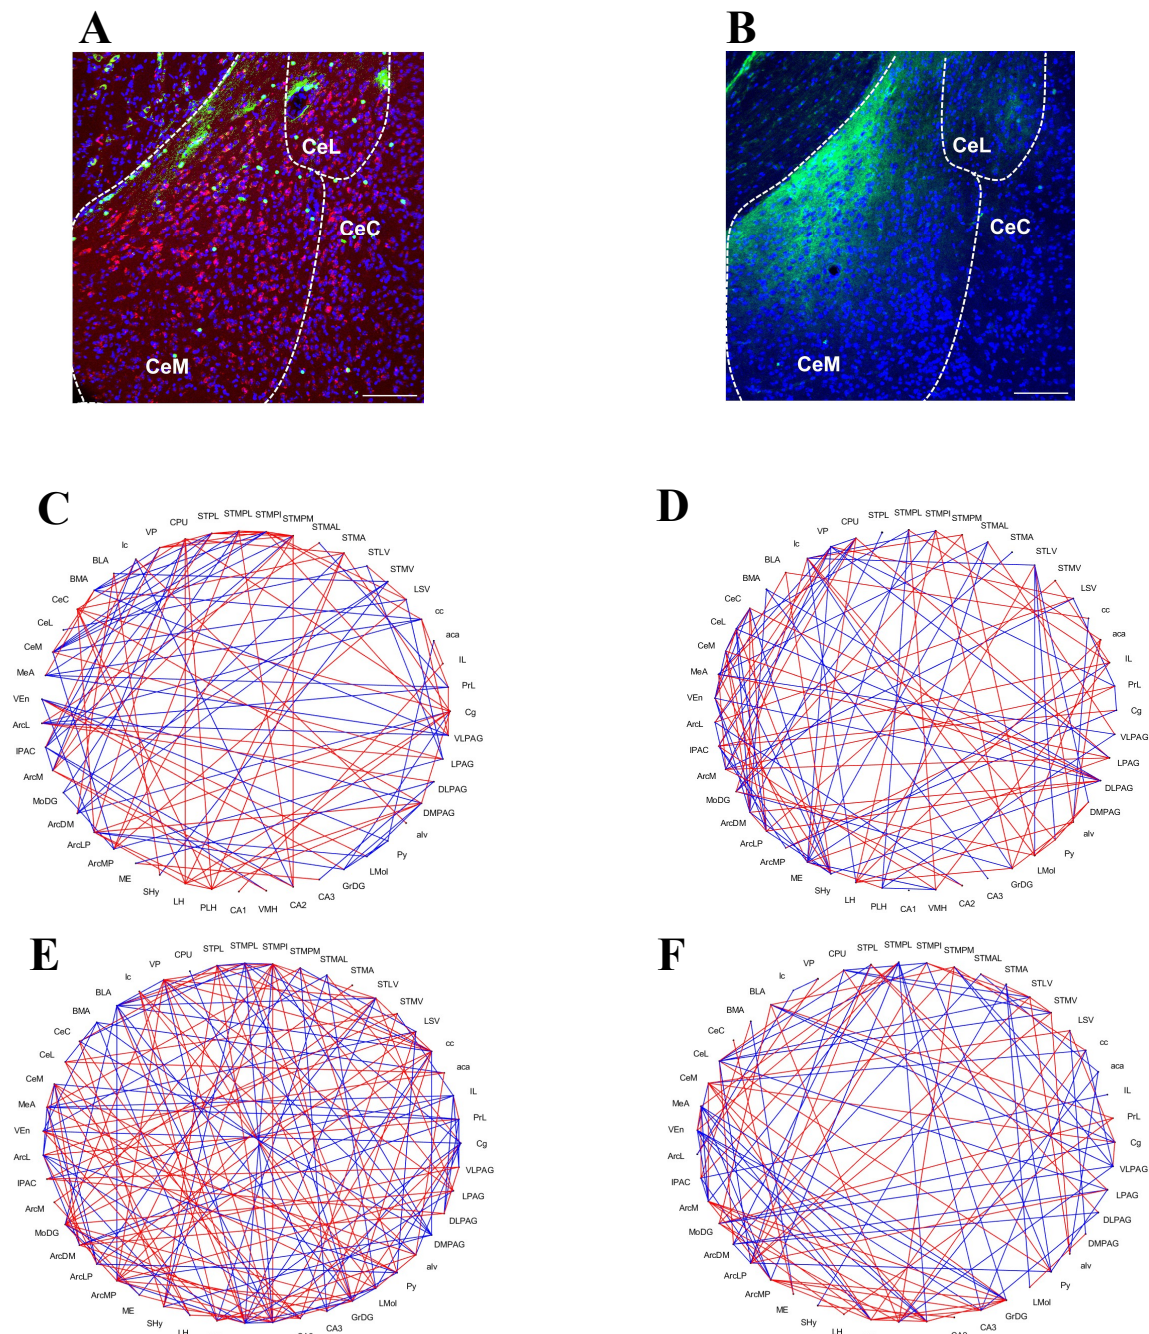

**Fig. S2. Correlational regional relationships in cFos expression during fear memory consolidation after CeM-*Tac2* chemogenetic silencing.**

(A) representative confocal image of cFos expression in the CeM during fear memory consolidation in wild-type mouse not expressing hM4Di; (B) representative confocal image of cFos expression in a CeM-expressing hM4Di(Gq) mouse during fear memory consolidation; (C-F), nodes and edges plots representing significant Pearson's correlation coefficients over 0.9 (red) and under  $-0.9$  (blue) between cFos expressing regions (C: wild-type males; D: hM4Di(Gq) males; E: wild-type females; F: hM4Di(Gq) females).



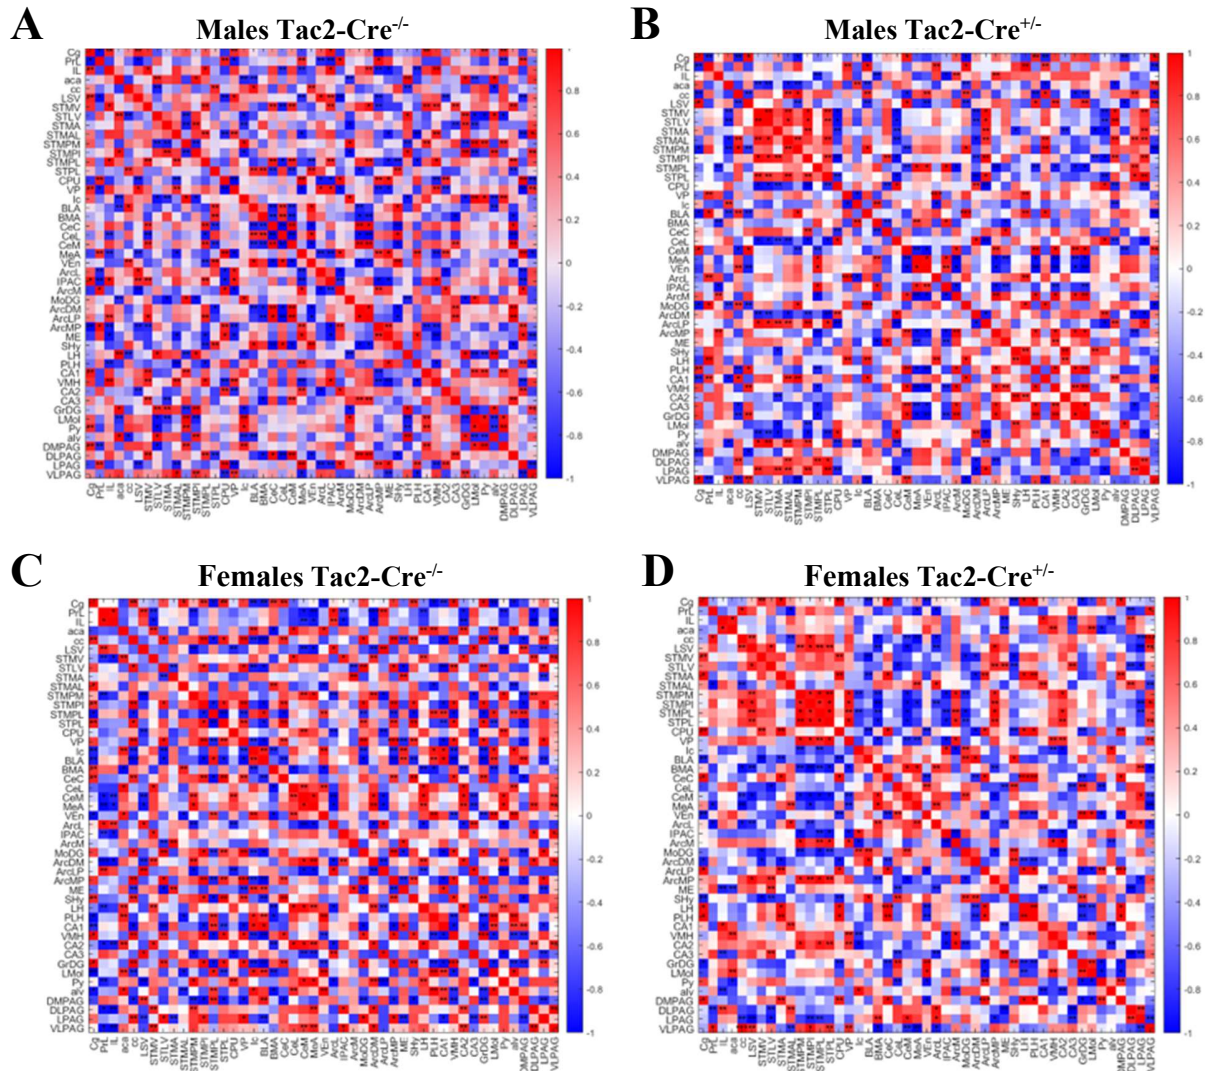

**Fig. S3. Network connectivity analyses of cFos expression in the mouse brain during fear memory consolidation after chemogenetic silencing of CeM-*Tac2* neurons.**

Heatmaps showing correlation coefficients of cFos expression between regions 2 hours after CeM-*Tac2* silencing in (A) wild-type male mice (B) heterozygous *Tac2*-cre male mice expressing hM4Di(Gq) in CeM-*Tac2* neurons and receiving CNO 30 minutes after fear conditioning; (C), wild-type female mice and (D), heterozygous *Tac2*-cre female mice expressing hM4Di(Gq) in CeM-*Tac2* neurons and receiving CNO 30 minutes after fear conditioning. Data were analyzed using Pearson's R coefficient. \*  $p < 0.05$ ; \*\*  $p < 0.01$ ; \*\*\*  $p < 0.001$ .

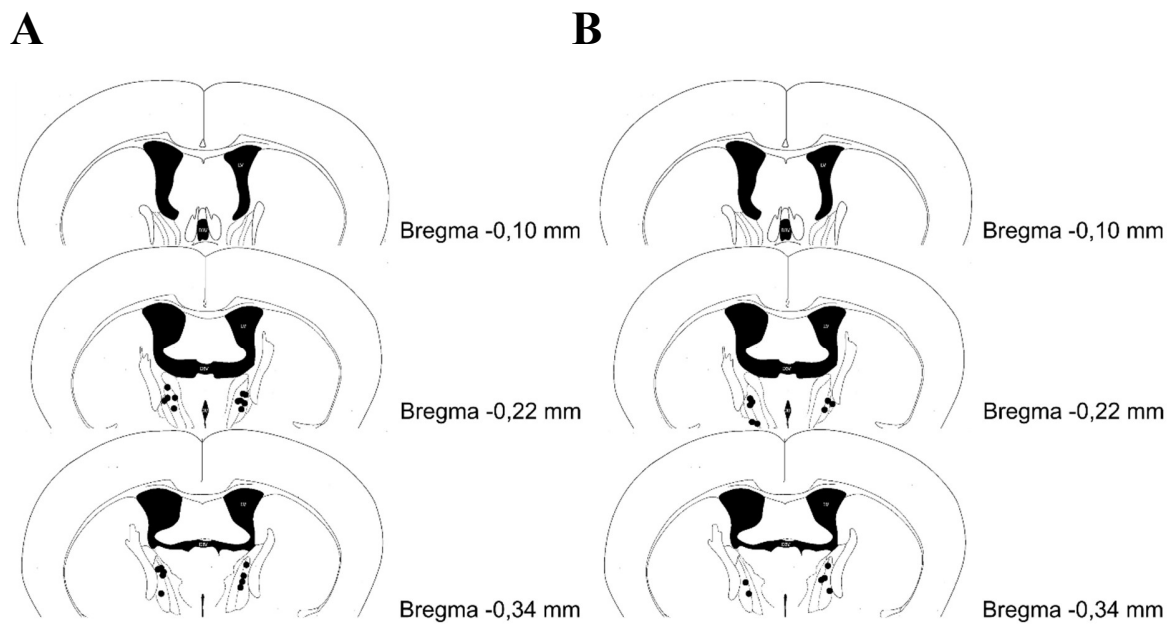

**Fig. S4. Histological reconstruction of cannula placement.**

The black dots represent CNO injection sites in males (A) and females (B).

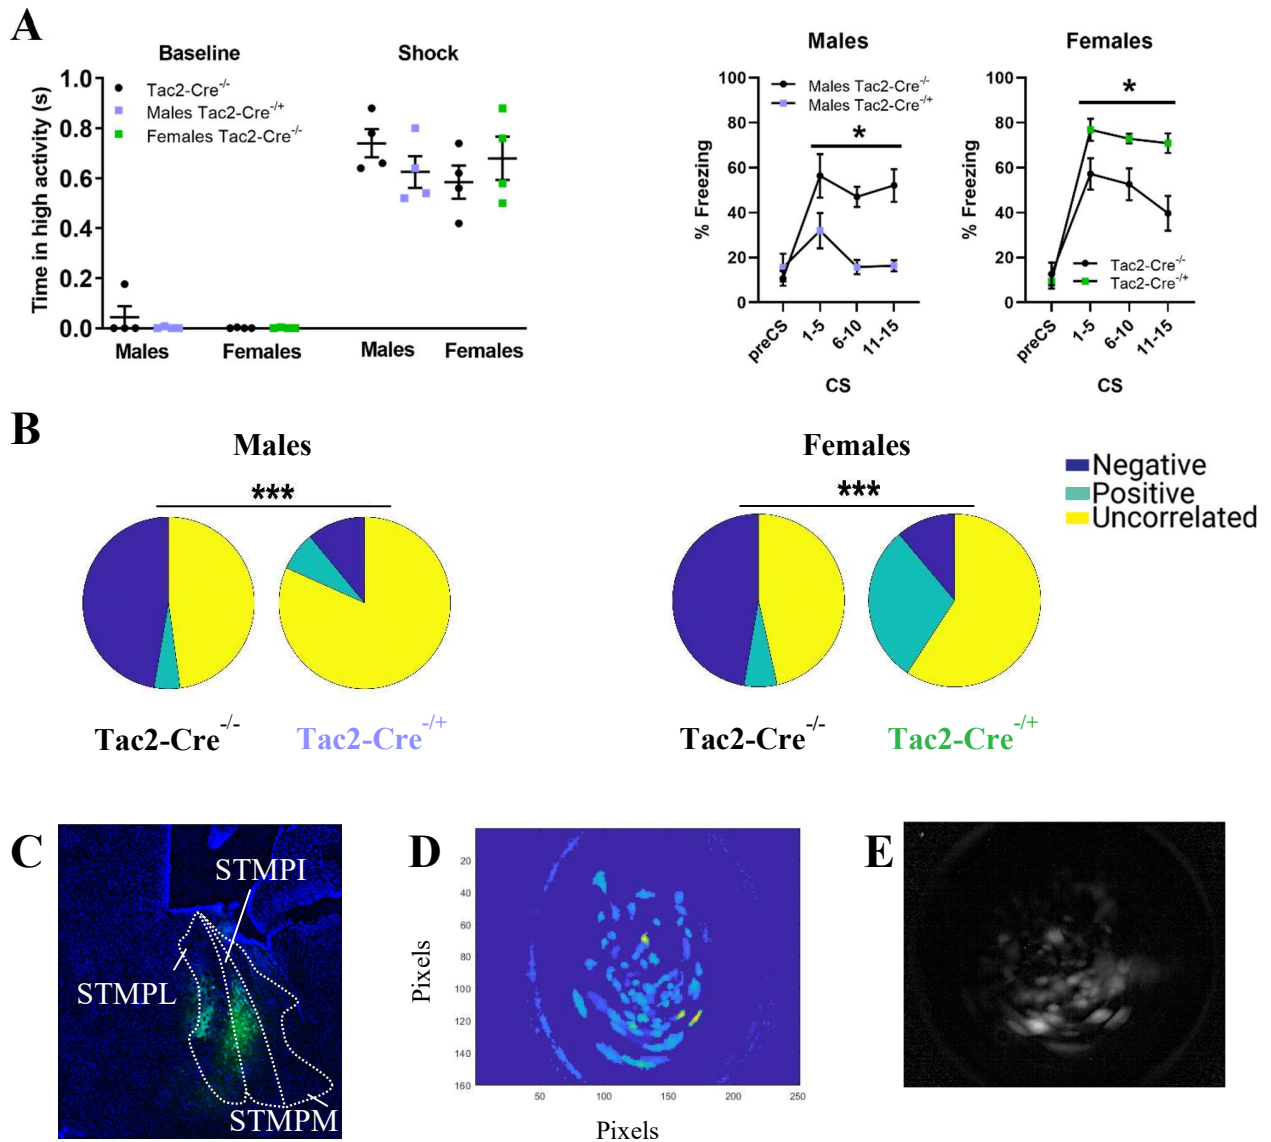

**Fig. S5. *In vivo* calcium imaging in freely moving mice (Miniscopes), and freezing behavior.**

(A) (Left) shock reactivity shown as duration of high activity peaks during the 5 seconds prior to the first shock (baseline) and during the first second after foot shock onset. No significant differences were observed in shock reactivity between groups in fear acquisition. (Right) binned data for the fear expression test. Data are shown as Mean  $\pm$  SEM. (B) The proportion of neurons correlating with freezing in Tac2-Cre<sup>-/-</sup> and Tac2-Cre<sup>+/-</sup> females during the PreCS. (C) green pixels represent GCaMP6f reporter expression in the BNST. Blue pixels represent DAPI. (D) Representative image of the spatial footprints of detected neurons in an animal during fear expression. (E) Maximum intensity projection of fluorescence detected across fear expression. Data were analyzed using One-way ANOVA, repeated measures ANOVA or Pearson's R coefficient. \*\*\*p < 0.001; \* p < 0.05.



| <b><i>TAC3R</i> rs2765 genotype</b> |          |           |                   |
|-------------------------------------|----------|-----------|-------------------|
|                                     | <b>n</b> | <b>AA</b> | <b>G carriers</b> |
| <b>Total</b>                        | 1099     | 306       | 666               |
| <b>Men</b>                          | 459      | 183       | 276               |
| <b>Women</b>                        | 640      | 205       | 390               |

**Table S2. *TAC3R* SNP rs 2765 genotype frequency for the human connectome project.**

Distribution of genotype frequencies for the SNP rs2765 in the *TAC3R* in the sample among men and women in the Human Connectome Project data.

| VARIABLES                                             | WOMEN          |                |                  | MEN            |                |                  |
|-------------------------------------------------------|----------------|----------------|------------------|----------------|----------------|------------------|
|                                                       | AA             | GA/GG          | <i>p</i> -values | AA             | GA/GG          | <i>p</i> -values |
| <b>SOCIODEMOGRAPHIC VARIABLES</b>                     |                |                |                  |                |                |                  |
| <b>Age (years)</b>                                    | 29,53 ± 3,63   | 29,52 ± 3,56   | 1                | 27,49 ± 3,42   | 28,15 ± 3,74   | 0.201            |
| <b>Race</b>                                           | 76% White      | 73% White      | 0.956            | 84% White      | 75% White      | 0.206            |
| <b>Years of education</b>                             | 14,97 ± 1,83   | 15,11 ± 1,82   | 1                | 14,78 ± 1,7    | 14,86 ± 1,79   | 0.654            |
| <b>SSAGA Income</b>                                   | 5,13 ± 2,08    | 5,22 ± 2,15    | 1                | 5,05 ± 2,18    | 5 ± 2,19       | 0.813            |
| <b>NEUROPSYCHOLOGICAL AND MENTAL HEALTH VARIABLES</b> |                |                |                  |                |                |                  |
| <b>Picture Sequence Memory Test†</b>                  | 106,54 ± 15,95 | 108,53 ± 15,55 | 1                | 102,93 ± 16,38 | 100,98 ± 17,29 | 0.706            |
| <b>Dimensional Change Card Sort Test†</b>             | 101,72 ± 10,07 | 102,2 ± 9,52   | 1                | 103,49 ± 9,99  | 101,88 ± 9,62  | 0.426            |
| <b>Flanker Task†</b>                                  | 100,11 ± 9,51  | 100,81 ± 9,61  | 1                | 102,72 ± 10,04 | 101,91 ± 10,59 | 0.796            |
| <b>Penn Progressive Matrices</b>                      | 16,39 ± 4,79   | 16,49 ± 4,68   | 1                | 17,38 ± 4,38   | 17,57 ± 4,83   | 0.426            |
| <b>Oral Reading Recognition Test†</b>                 | 105,17 ± 14,25 | 105,57 ± 14,71 | 1                | 107,68 ± 14,58 | 109,69 ± 14,85 | 0.276            |

|                                                  |                  |                  |       |                 |                 |                    |
|--------------------------------------------------|------------------|------------------|-------|-----------------|-----------------|--------------------|
| <b>Picture Vocabulary Test†</b>                  | 107,55 ± 15,48   | 107,62 ± 14,5    | 1     | 110,41 ± 13,62  | 112,19 ± 15,7   | 0.310              |
| <b>Pattern Comparison Processing Speed Test†</b> | 104,75 ± 17,83   | 102,89 ± 19,97   | 1     | 104,15 ± 20,93  | 102,41 ± 20,79  | 0.775              |
| <b>Variable Short Penn Line Orientation Test</b> | 14,45 ± 4,53     | 13,78 ± 4,35     | 1     | 16,45 ± 4,32    | 15,8 ± 4,19     | 0.279              |
| <b>SCPT Sensitivity</b>                          | 0,95 ± 0,09      | 0,95 ± 0,08      | 1     | 0,95 ± 0,09     | 0,96 ± 0,06     | 0.426              |
| <b>SCPT Specificity</b>                          | 0,96 ± 0,02      | 0,96 ± 0,04      | 0.617 | 0,95 ± 0,03     | 0,95 ± 0,04     | 0.850              |
| <b>PWMT Correct responses</b>                    | 35,96 ± 3,05     | 35,87 ± 2,79     | 1     | 35,21 ± 2,95    | 35,3 ± 2,96     | 0.654              |
| <b>PWMT Reaction time</b>                        | 1561,81 ± 268,06 | 1571,95 ± 302,94 | 1     | 1553,4 ± 305,37 | 1572,7 ± 329,38 | 0.796              |
| <b>ER40 Correct responses</b>                    | 35,58 ± 2,43     | 35,83 ± 2,45     | 0.996 | 35,13 ± 2,62    | 35,48 ± 2,64    | 0.544              |
| <b>ER40 Reaction time</b>                        | 1776,71 ± 287,83 | 1819,74 ± 297,31 | 1     | 1847,3 ± 352,42 | 1904,48 ± 386,5 | 0.242              |
| <b>Perceived Stress Survey</b>                   | 48,68 ± 9,26     | 48,85 ± 8,85     | 1     | 45,72 ± 9,16    | 49,29 ± 9,35    | <b>0.009</b><br>** |
| <b>Self-Efficacy Survey</b>                      | 50,43 ± 8,36     | 49,85 ± 8,01     | 1     | 53,4 ± 8,47     | 51,12 ± 8,55    | 0.052              |
| <b>Five Factor Model - Neuroticism</b>           | 17,84 ± 6,92     | 17,23 ± 7,27     | 1     | 14,5 ± 7,47     | 16,61 ± 7,7     | <b>0.044</b><br>*  |
| <b>Friendship Survey</b>                         | 50,97 ± 9,03     | 50,25 ± 9,37     | 1     | 51,33 ± 8,8     | 49,67 ± 8,88    | 0.201              |

|                                         |              |              |       |              |              |                   |
|-----------------------------------------|--------------|--------------|-------|--------------|--------------|-------------------|
| <b>Loneliness Survey</b>                | 50,81 ± 8,03 | 51,4 ± 8,32  | 1     | 49,87 ± 8,48 | 51,61 ± 9,22 | 0.109             |
| <b>Perceived Hostility Survey</b>       | 47,29 ± 8,45 | 47,59 ± 8,77 | 1     | 48,37 ± 8,26 | 50,51 ± 8,2  | <b>0.044</b><br>* |
| <b>Emotional Support Survey</b>         | 53,49 ± 8,76 | 51,85 ± 9,64 | 0.956 | 51,43 ± 9,72 | 49,57 ± 9,89 | 0.097             |
| <b>Instrumental Support Survey</b>      | 48,45 ± 8,65 | 48,52 ± 8,59 | 1     | 48,05 ± 9,02 | 47,99 ± 9,54 | 0.826             |
| <b>Anger-Affect Survey</b>              | 47,11 ± 8,5  | 47,75 ± 7,73 | 1     | 47,07 ± 8,62 | 48,85 ± 8,53 | 0.178             |
| <b>Anger-Hostility Survey</b>           | 50,75 ± 8,63 | 49,73 ± 8,35 | 1     | 50,25 ± 8,81 | 51,72 ± 8,76 | 0.201             |
| <b>Anger-Physical Aggression Survey</b> | 49,54 ± 7,52 | 49,83 ± 8,36 | 1     | 54,16 ± 9,32 | 54,33 ± 9,01 | 0.826             |
| <b>Fear-Affect Survey</b>               | 51,33 ± 7,92 | 50,81 ± 8,2  | 1     | 48,78 ± 7,75 | 49,64 ± 7,85 | 0.426             |
| <b>Fear-Somatic Arousal Survey</b>      | 52,07 ± 8,63 | 51,81 ± 8,16 | 1     | 51,83 ± 7,54 | 50,88 ± 8,21 | 0.775             |
| <b>Sadness Survey</b>                   | 45,87 ± 7,84 | 46,4 ± 7,94  | 1     | 44,96 ± 7,89 | 46,83 ± 7,99 | 0.062             |
| <b>General Life Satisfaction Survey</b> | 54,99 ± 9,36 | 54,94 ± 9,66 | 1     | 55,16 ± 8,64 | 53,6 ± 8,99  | 0.201             |
| <b>Meaning and Purpose Survey</b>       | 53,35 ± 8,19 | 52,23 ± 9,08 | 1     | 51,61 ± 9,19 | 51,07 ± 8,38 | 0.414             |
| <b>Positive Affect Survey</b>           | 50,64 ± 7,73 | 50,3 ± 8,07  | 1     | 50,47 ± 7,89 | 49,65 ± 8,02 | 0.426             |
| <b>ASR Anxiety and Depression‡</b>      | 53,75 ± 5,7  | 53,61 ± 6,47 | 1     | 53,19 ± 5,29 | 54,71 ± 6,93 | <b>0.044</b><br>* |

|                                          |              |              |   |               |               |                   |
|------------------------------------------|--------------|--------------|---|---------------|---------------|-------------------|
| <b>ASR Somatic Complaints‡</b>           | 53,66 ± 5,53 | 54 ± 6,6     | 1 | 53,37 ± 5,55  | 54,08 ± 5,78  | 0.206             |
| <b>ASR Thought Problems‡</b>             | 53,28 ± 5,39 | 53,02 ± 5,5  | 1 | 53,22 ± 5,16  | 54,55 ± 5,93  | <b>0.044</b><br>* |
| <b>ASR Attention Problems‡</b>           | 54,4 ± 5,94  | 53,98 ± 5,64 | 1 | 54,91 ± 4,69  | 56,14 ± 5,53  | <b>0.044</b><br>* |
| <b>ASR Aggressive Behavior‡</b>          | 52,29 ± 3,61 | 52,08 ± 4,12 | 1 | 52,33 ± 3,98  | 53,18 ± 4,61  | 0.109             |
| <b>ASR Rule Breaking Behavior‡</b>       | 52,95 ± 4,29 | 53,24 ± 4,75 | 1 | 54,49 ± 5,46  | 54,47 ± 5,87  | 0.845             |
| <b>ASR Intrusive‡</b>                    | 53,35 ± 5    | 53,29 ± 5,01 | 1 | 53,81 ± 5,28  | 54,81 ± 6,01  | 0.279             |
| <b>ASR Internalizing‡</b>                | 48,05 ± 9,91 | 48,24 ± 10,7 | 1 | 47,16 ± 10,47 | 49,94 ± 11,29 | <b>0.044</b><br>* |
| <b>ASR Externalizing‡</b>                | 47,05 ± 8,98 | 47,23 ± 9,05 | 1 | 49,48 ± 8,18  | 50,62 ± 8,54  | 0.213             |
| <b>ASR Total Problems‡</b>               | 46,69 ± 8,77 | 46,64 ± 9,23 | 1 | 47,82 ± 8,03  | 49,79 ± 8,84  | <b>0.044</b><br>* |
| <b>DSM Depressive Problems</b>           | 53,75 ± 5,35 | 53,75 ± 5,81 | 1 | 53,23 ± 5,59  | 54,29 ± 6,1   | 0.124             |
| <b>DSM Anxiety Problems</b>              | 53,23 ± 4,96 | 53,41 ± 5,83 | 1 | 52,57 ± 4,33  | 53,43 ± 5,28  | 0.109             |
| <b>DSM Somatic Problems</b>              | 53,86 ± 5,22 | 53,97 ± 6,27 | 1 | 53,51 ± 5,62  | 54,14 ± 5,92  | 0.244             |
| <b>DSM Avoidant Personality Problems</b> | 53,81 ± 5,79 | 53,96 ± 5,65 | 1 | 54,1 ± 5,4    | 55,56 ± 7,1   | 0.052             |
| <b>DSM AD/H Problems</b>                 | 54,19 ± 5,92 | 53,64 ± 5,77 | 1 | 54,95 ± 4,98  | 56,25 ± 6,13  | <b>0.044</b><br>* |



|                                            |             |              |   |              |             |       |
|--------------------------------------------|-------------|--------------|---|--------------|-------------|-------|
| <b>DSM Antisocial Personality Problems</b> | 52,4 ± 3,9  | 52,45 ± 4,34 | 1 | 53,17 ± 5,06 | 53,5 ± 5,29 | 0.650 |
| <b>SSAGA Childhood Conduct</b>             | 0,37 ± 0,62 | 0,34 ± 0,61  | 1 | 0,7 ± 0,87   | 0,79 ± 0,89 | 0.706 |
| <b>SSAGA Panic Disorder</b>                | 7%          | 9%           | 1 | 8%           | 7%          | 0.612 |
| <b>SSAGA Agoraphobia</b>                   | 8%          | 7%           | 1 | 7%           | 6%          | 0.853 |
| <b>SSAGA Past Depressive episode</b>       | 9%          | 10%          | 1 | 6%           | 10%         | 0.317 |
| <b>SSAGA Past Depressive symptoms</b>      | 1,55 ± 2,68 | 1,44 ± 2,68  | 1 | 0,73 ± 1,97  | 1,23 ± 2,57 | 0.290 |
| <b>Mother with Anxiety</b>                 | 6%          | 4%           | 1 | 2%           | 5%          | 0.426 |
| <b>Father with Anxiety</b>                 | 2%          | 4%           | 1 | 2%           | 4%          | 0.593 |
| <b>Mother with Depression</b>              | 13%         | 10%          | 1 | 7%           | 8%          | 0.808 |
| <b>Father with Depression</b>              | 8%          | 4%           | 1 | 8%           | 5%          | 0.706 |

#### TASK PERFORMANCE

|                                       |                 |                 |   |                 |                 |       |
|---------------------------------------|-----------------|-----------------|---|-----------------|-----------------|-------|
| <b>Accuracy to Fearful Faces</b>      | 98,6 ± 4,33     | 98,47 ± 2,53    | 1 | 98,09 ± 3,03    | 98,74 ± 4,5     | 0.414 |
| <b>Reaction time to Fearful Faces</b> | 811,21 ± 128,2  | 798,91 ± 139,01 | 1 | 767,23 ± 127,48 | 775,07 ± 125,76 | 0.865 |
| <b>Accuracy to Shapes</b>             | 97,34 ± 4,31    | 96,76 ± 3,96    | 1 | 96,4 ± 3,35     | 96,16 ± 5,92    | 0.593 |
| <b>Reaction time to Shapes</b>        | 785,21 ± 109,07 | 789,57 ± 120,72 | 1 | 737,39 ± 105,58 | 759,59 ± 112,36 | 0.212 |

|                                         |               |              |   |              |               |       |
|-----------------------------------------|---------------|--------------|---|--------------|---------------|-------|
| <b>Accuracy (Faces vs. Shapes)</b>      | 1,26 ± 3,59   | 1,7 ± 4,3    | 1 | 1,69 ± 3,98  | 2,58 ± 4,55   | 0.192 |
| <b>Reaction time (Faces vs. Shapes)</b> | 26,01 ± 79,74 | 9,34 ± 86,61 | 1 | 29,85 ± 84,4 | 15,48 ± 77,83 | 0.165 |

**Table S3. Descriptive statistics (Mean ± SD; %) and between-group comparisons of sociodemographic, neuropsychological, mental health and task performance variables.**

Groups defined by rs2765 genotype (AA or GA/GG) and analyses performed independently for each sex. Between-group comparisons were performed by means of t-tests or  $\chi^2$  tests when appropriate. p values were corrected for multiple comparisons using the false discovery rate (FDR) method. SSAGA: Semi Structured Assessment For The Genetics Of Alcoholism; SCPT: Short Penn Continuous Performance Test; PWMT: Penn Word Memory Test; ER-40: Penn Emotion Recognition Test; ASR: Achenbach Adult Self-Report - Syndrome Scales; DSM: Achenbach DSM-Oriented Scale. Data were analyzed using t-test. †Adjusted by age. ‡Adjusted by age and gender. \*pFDR < 0.05. \*\*pFDR < 0.01.

### SNP rs2765 *TAC3R*

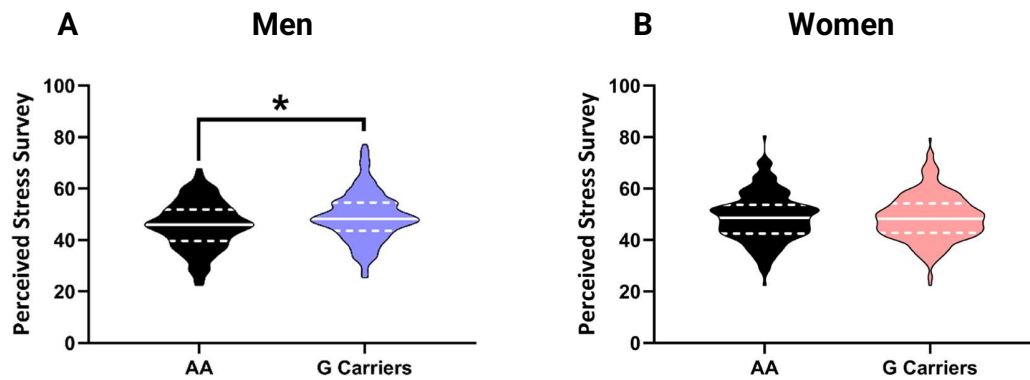

**Fig. S6. Perceived stress survey results in men and women with the SNP rs2765 *TAC3R*.**

(A) Men with the AA allele scored lower than men G carriers in the perceived stress survey of the human connectome project database. (B) There were no differences between women AA and G carriers in the perceived stress survey. Data are expressed as mean, first quartile (bottom dashed line) and third quartile (top dashed line) and analyzed using t-test. \* pFDR <0.05.

| Subject                                             | Age (years) | Postmortem delay (hours) | RIN | Mechanism of death       | Drugs in blood (mg/l) and ethanol (g/l) |
|-----------------------------------------------------|-------------|--------------------------|-----|--------------------------|-----------------------------------------|
| <b>Men subjects</b>                                 |             |                          |     |                          |                                         |
| <b>Men subjects included in both studies (n=89)</b> |             |                          |     |                          |                                         |
| 1                                                   | 63          | 48                       | 6.9 | Accidental               | ETH (0.76)                              |
| 2                                                   | 18          | 25                       | 6.3 | Traffic                  |                                         |
| 3                                                   | 74          | 46                       | 6.5 | Traffic                  |                                         |
| 4                                                   | 81          | 41                       | 3.1 | Traffic                  |                                         |
| 5                                                   | 16          | 30                       | 4.3 | Traffic                  |                                         |
| 6                                                   | 20          | 48                       | 5.2 | Traffic                  |                                         |
| 7                                                   | 31          | 59                       | 4.9 | Traffic                  | ETH (0.61)                              |
| 8                                                   | 41          | 19                       | 7.4 | Accidental               |                                         |
| 9                                                   | 19          | 22                       | 4.3 | traffic                  |                                         |
| 10                                                  | 47          | 63                       | 5.2 | Traffic                  | ETH (1.16), LID (therapeutic range)     |
| 11                                                  | 18          | 44                       | 2.2 | Traffic                  |                                         |
| 12                                                  | 29          | 36.5                     | 6.2 | Traffic                  | ETH (1.71)                              |
| 13                                                  | 42          | 27                       | 5.2 | Traffic                  | ATR                                     |
| 14                                                  | 22          | 32                       | 8.5 | Traffic                  | ETH (1.04)                              |
| 15                                                  | 26          | 33                       | 6.3 | Traffic                  |                                         |
| 16                                                  | 16          | 28                       | 5.9 | Traffic                  |                                         |
| 17                                                  | 18          | 48                       | 4.4 | Traffic                  |                                         |
| 18                                                  | 19          | 20                       | 7.6 | Traffic                  | THC                                     |
| 19                                                  | 30          | 23.5                     | 6.9 | Accidental electrocution | ETH (0.74)                              |
| 20                                                  | 29          | 31                       | 8.2 | Traffic                  | ETH (1.48)                              |
| 21                                                  | 19          | 29                       | 6.4 | Traffic                  | ETH (1.15)                              |
| 22                                                  | 80          | 96                       | 6.1 | Traffic                  |                                         |
| 23                                                  | 26          | 27                       | 6.1 | Traffic                  |                                         |
| 24                                                  | 42          | 41                       | 6.7 | Accidental drowning      | ETH (1.34)                              |
| 25                                                  | 62          | 41                       | 6.0 | Accidental drowning      | ETH (0.29)                              |
| 26                                                  | 59          | 41                       | 7.5 | Traffic                  |                                         |
| 27                                                  | 73          | 19                       | 7.5 | Traffic                  |                                         |
| 28                                                  | 43          | 43                       | 5.2 | Traffic                  |                                         |
| 29                                                  | 19          | 61                       | 7.9 | Traffic                  | CQN (3.4)                               |
| 30                                                  | 43          | 59                       | 5.9 | Traffic                  |                                         |
| 31                                                  | 37          | 55                       | 3.7 | Traffic                  | ETH (0.17)                              |
| 32                                                  | 19          | 54                       | 5.1 | Traffic                  |                                         |
| 33                                                  | 42          | 9                        | 6.2 | Traffic                  |                                         |
| 34                                                  | 41          | 20                       | 5.7 | Traffic                  | ATR, LID, MOR                           |
| 35                                                  | 58          | 27                       | 2.4 | Accidental jumping       |                                         |
| 36                                                  | 23          | 32                       | 5.4 | Traffic                  |                                         |
| 37                                                  | 71          | 17.5                     | 5.4 | Traffic                  | ETH (0.35)                              |
| 38                                                  | 4           | 46                       | 4.1 | Accidental               |                                         |
| 39                                                  | 19          | 18                       | 4.7 | Traffic                  |                                         |
| 40                                                  | 18          | 18                       | 7.3 | Traffic                  |                                         |
| 41                                                  | 8           | 23                       | 7.3 | Accidental gunshot       |                                         |
| 42                                                  | 60          | 51                       | 7.0 | Accidental bullfighting  | ETH (1.02)                              |
| 43                                                  | 78          | 39                       | 6.6 | Traffic                  |                                         |
| 44                                                  | 60          | 26.5                     | 6.4 | Traffic                  | TCP                                     |

|                                                      |    |      |     |                          |                         |
|------------------------------------------------------|----|------|-----|--------------------------|-------------------------|
| 45                                                   | 49 | 35.5 | 6.4 | Accidental fall          | ATR (4100), ETH (3.75)  |
| 46                                                   | 70 | 14.5 | 8.1 | Traffic                  | ETH (0.29), MID         |
| 47                                                   | 49 | 48   | 5.5 | Accidental fall          | N/A                     |
| 48                                                   | 77 | 44   | 4.8 | Traffic                  | ETH (0.3)               |
| 49                                                   | 16 | 36   | 4.4 | Traffic                  | ETH (1.77)              |
| 50                                                   | 62 | 47.5 | 5.9 | Traffic                  | N/A                     |
| 51                                                   | 65 | 49.5 | 7.6 | Traffic                  |                         |
| 52                                                   | 66 | 20   | 6.5 | Accidental jumping       | ETH (0.84)              |
| 53                                                   | 51 | 47   | 7.6 | Crushed                  | ATR                     |
| 54                                                   | 73 | 49   | 5.4 | Traffic                  |                         |
| 55                                                   | 22 | 63   | 4.5 | Traffic                  |                         |
| 56                                                   | 47 | 26   | 5.7 | Accident                 |                         |
| 57                                                   | 66 | 50   | 4.6 | Traffic                  |                         |
| 58                                                   | 13 | 22.5 | 7.7 | Traffic                  |                         |
| 59                                                   | 22 | 25   | 4.5 | Traffic                  |                         |
| 60                                                   | 55 | 60   | 5.2 | Traffic                  | MMZ                     |
| 61                                                   | 20 | 34   | 7.1 | Traffic                  |                         |
| 62                                                   | 39 | 21   | 5.1 | Traffic                  | ATR, THC                |
| 63                                                   | 25 | 20.5 | 7.5 | Accident                 | THC                     |
| 64                                                   | 21 | 16   | 6.5 | Traffic                  |                         |
| 65                                                   | 34 | 27   | 8.4 | Traffic                  | N/A                     |
| 66                                                   | 84 | 21.5 | 4.8 | Polytrauma by train      |                         |
| 67                                                   | 17 | 16   | 6.4 | Traffic                  |                         |
| 68                                                   | 76 | 28   | 6.5 | Traffic                  |                         |
| 69                                                   | 42 | 27   | 5.3 | Crushed                  | ATR                     |
| 70                                                   | 63 | 44   | 4.7 | Traffic                  | ETH (0.44), PCT         |
| 71                                                   | 16 | 22.5 | 4.6 | Accidental jumping       |                         |
| 72                                                   | 56 | 38   | 4.5 | Traffic                  | ETH (2.2), SAL          |
| 73                                                   | 69 | 23   | 6.5 | Traffic                  |                         |
| 74                                                   | 15 | 5.5  | 3.3 | Accidental jumping       |                         |
| 75                                                   | 20 | 21   | 5.9 | Traffic                  |                         |
| 76                                                   | 71 | 14   | 7.3 | Crushed                  |                         |
| 77                                                   | 48 | 9.5  | 8.1 | Accidental fall          | CLO, FUR, NAP, PCT, TIA |
| 78                                                   | 22 | 4    | 6.7 | Traffic                  |                         |
| 79                                                   | 48 | 7    | 5.9 | Traffic                  |                         |
| 80                                                   | 58 | 16   | 7.7 | Traffic                  | ETH (0.77)              |
| 81                                                   | 22 | 20   | 3.7 | Traffic                  | NDZP (0.38)             |
| 82                                                   | 61 | 23   | 5.9 | Traffic                  | ETH (0.72)              |
| 83                                                   | 18 | 9    | 8.1 | Traffic                  | ETH (0.14)              |
| 84                                                   | 19 | 12   | 5.8 | Traffic                  | AMP (0.18), ETH (0.88)  |
| 85                                                   | 30 | 11   | 8.2 | Accidental electrocution | THC                     |
| 86                                                   | 32 | 28   | 5.9 | Traffic                  | AMP, ETH (0.68)         |
| 87                                                   | 89 | 33   | 5.5 | Accidental jumping       | N/A                     |
| 88                                                   | 18 | 3.5  | 7.5 | Traffic                  |                         |
| 89                                                   | 56 | 4    | 4.6 | Accidental hyperthermia  | ETH (2.26)              |
| <b>Men subjects not included in genotyping study</b> |    |      |     |                          |                         |
| 90                                                   | 21 | 31   | 5.8 | Traffic                  | AMP, ETH (0.24), THC    |
| 91                                                   | 20 | 16   | 7.4 | Traffic                  | AMP, EPH                |
| <b>Men subjects included in mRNA study (n=91)</b>    |    |      |     |                          |                         |



| Mean±SEM                                              | 41±2 | 31±2 | 6.0±0.1 |                                 |                                    |
|-------------------------------------------------------|------|------|---------|---------------------------------|------------------------------------|
| <b>Men subjects not included in mRNA study (n=42)</b> |      |      |         |                                 |                                    |
| 92                                                    | 45   | 30   |         | Traffic                         | ETH (3.09)                         |
| 93                                                    | 36   | 32.5 |         | Traffic                         | ETH (1)                            |
| 94                                                    | 37   | 54   |         | Traffic                         | ETH (2.2)                          |
| 95                                                    | 79   | 66   |         | Traffic                         |                                    |
| 96                                                    | 36   | 14   |         | Traffic                         | ETH (0.3)                          |
| 97                                                    | 28   | 15   |         | Traffic                         | ETH (2.71)                         |
| 98                                                    | 47   | 20.5 |         | Accidental jumping              | MID, ATR                           |
| 99                                                    | 19   | 28   |         | Traffic                         |                                    |
| 100                                                   | 62   | 44   |         | Traffic                         | LID (1.8)                          |
| 101                                                   | 43   | 15   |         | Traffic                         |                                    |
| 102                                                   | 37   | 21   |         | Accidental                      |                                    |
| 103                                                   | 49   | 17   |         | Traffic                         |                                    |
| 104                                                   | 41   | 24   |         | Paragliding accident            |                                    |
| 105                                                   | 20   | 37   |         | Traffic                         |                                    |
| 106                                                   | 38   | 33   |         | Traffic                         | ETH (1.62)                         |
| 107                                                   | 39   | 66.5 |         | Traffic                         | ETH (1.23)                         |
| 108                                                   | 70   | 41   |         | Traffic                         | ETH (0.23)                         |
| 109                                                   | 43   | 45   |         | Accidental jumping              |                                    |
| 110                                                   | 58   | 19   |         | Accidental                      | ETH (0.99)                         |
| 111                                                   | 23   | 27   |         | Traffic                         |                                    |
| 112                                                   | 28   | 30   |         | Traffic                         |                                    |
| 113                                                   | 59   | 38   |         | Traffic                         | ETH (0.13)                         |
| 114                                                   | 52   | 14   |         | Traffic                         | ETH (0.83)                         |
| 115                                                   | 33   | 41   |         | Traffic                         |                                    |
| 116                                                   | 78   | 22   |         | Traffic                         |                                    |
| 117                                                   | 37   | 38   |         | Traffic                         | ETH (0.3), LID (5)                 |
| 118                                                   | 40   | 60   |         | Traffic                         |                                    |
| 119                                                   | 54   | 26   |         | Accident                        |                                    |
| 120                                                   | N/A  | N/A  |         | Accident                        |                                    |
| 121                                                   | 55   | 15.5 |         | Traffic                         |                                    |
| 122                                                   | 29   | 58   |         | Traffic                         | ETH (0.37)                         |
| 123                                                   | 34   | 60   |         | Traffic                         | ETH (0.74), LID, TPL               |
| 124                                                   | 25   | 42.5 |         | Crushed                         | ATR                                |
| 125                                                   | 48   | 20   |         | Traffic                         |                                    |
| 126                                                   | 26   | 52   |         | Traffic                         | ETH (1.23)                         |
| 127                                                   | 29   | 19   |         | Accident                        | PCT                                |
| 128                                                   | 36   | 18   |         | Accident                        | BLG (0.08), ETH (1.69)             |
| 129                                                   | 40   | 18   |         | Accident                        | ETH (0.56)                         |
| 130                                                   | 31   | 19   |         | Traffic                         |                                    |
| 131                                                   | 51   | 33   |         | Accidental ethylic intoxication | ETH (4.93)                         |
| 132                                                   | 43   | 10   |         | Traffic                         | ETH (2.5)                          |
| 133                                                   | 52   | 18.5 |         | Accident                        | EPH, pseudoEPH, LAU, MID, MOR, MND |
| <b>All men subjects in the study (n=133)</b>          |      |      |         |                                 |                                    |
| Mean±SEM                                              | 41±2 | 31±1 |         |                                 |                                    |

| <b>Women subjects</b>                                  |      |      |         |                        |                                   |
|--------------------------------------------------------|------|------|---------|------------------------|-----------------------------------|
| <b>Women subjects included in both studies (n=33)</b>  |      |      |         |                        |                                   |
| 134                                                    | 59   | 25   | 7.7     | Traffic                | AMI, ATR, NTI                     |
| 135                                                    | 20   | 53.5 | 6.9     | Traffic                |                                   |
| 136                                                    | 73   | 38.5 | 4.2     | Choke on food          |                                   |
| 137                                                    | 28   | 55   | 7.2     | Traffic                |                                   |
| 138                                                    | 23   | 15   | 4.1     | Traffic                | ETH (0.72)                        |
| 139                                                    | 23   | 17.5 | 7.5     | Traffic                |                                   |
| 140                                                    | 51   | 62   | 5.4     | Traffic                | ATR                               |
| 141                                                    | 35   | 24.5 | 5.5     | Traffic                |                                   |
| 142                                                    | 23   | 60   | 4.8     | Traffic                | ACU, MID                          |
| 143                                                    | 52   | 26   | 5.6     | Traffic                |                                   |
| 144                                                    | 25   | 25   | 7.3     | Traffic                |                                   |
| 145                                                    | 26   | 30   | 5.1     | Traffic                |                                   |
| 146                                                    | 81   | 40   | 7.8     | Traffic                | N/A                               |
| 147                                                    | 16   | 15   | 7.7     | Traffic                |                                   |
| 148                                                    | 29   | 31   | 6.1     | Traffic                |                                   |
| 149                                                    | 19   | 56.5 | 7.0     | Traffic                | ETH (0.16)                        |
| 150                                                    | 42   | 61.5 | 6.9     | Traffic                |                                   |
| 151                                                    | 85   | 58   | 6.6     | Traffic                | PXC                               |
| 152                                                    | 16   | 38   | 5.3     | Train accident         |                                   |
| 153                                                    | 79   | 39   | 6.7     | Traffic                |                                   |
| 154                                                    | 74   | 21   | 4.7     | Traffic                |                                   |
| 155                                                    | 20   | 40   | 3.3     | Traffic                |                                   |
| 156                                                    | 52   | 64   | 6.4     | Traffic                |                                   |
| 157                                                    | 79   | 28   | 6.7     | Traffic                |                                   |
| 158                                                    | 43   | 16   | 4.4     | Traffic                |                                   |
| 159                                                    | 77   | 13.5 | 6.2     | Traffic                | PBB, PRI                          |
| 160                                                    | 35   | 22   | 8.2     | Traffic                |                                   |
| 161                                                    | 69   | 19   | 7.7     | Traffic                | NVER (<0.1), VER (0.1)            |
| 162                                                    | 32   | 10   | 5.5     | Traffic                | AMP (0.04), COC (2.1), THC (0.03) |
| 163                                                    | 66   | 16   | 7.4     | Traffic                |                                   |
| 164                                                    | 81   | 13   | 9.0     | Traffic                |                                   |
| 165                                                    | 70   | 14   | 8.2     | Accidental suffocation | CIT, TFS                          |
| 166                                                    | 80   | 17   | 6.9     | Traffic                | ATR, PCT                          |
| <b>Women subjects included in mRNA study (n=33)</b>    |      |      |         |                        |                                   |
| Mean±SEM                                               | 48±4 | 32±3 | 6.4±0.2 |                        |                                   |
| <b>Women subjects not included in mRNA study (n=6)</b> |      |      |         |                        |                                   |
| 167                                                    | 88   | 39   |         | Traffic                |                                   |
| 168                                                    | 41   | 22   |         | Traffic                |                                   |
| 169                                                    | 33   | 68   |         | Traffic                |                                   |
| 170                                                    | 50   | 31   |         | Traffic                |                                   |
| 171                                                    | 75   | 39   |         | Traffic                |                                   |
| 172                                                    | 70   | 6.5  |         | Traffic                |                                   |
| <b>All women subjects in the study (n=39)</b>          |      |      |         |                        |                                   |
| Mean±SEM                                               | 50±4 | 33±3 |         |                        |                                   |

**Table S4. Subjects in the post-mortem analyses.**

Age, post-mortem delay, RIN, mechanism of death and drugs in blood are reported in this table. ACU, atracurium; AMI, amitriptyline; AMP, amphetamine; ATR, atropine; BLG, benzoylecgonine; CIT, citalopram; COC, cocaine; CLO, clomethiazole; CQN, cloroquine; EPH, ephedrine; ETH, ethanol; FUR, furosemide; LAU, laudanosine; LID, lidocaine; MID, midazolam; MMZ, metamizol; MND, metronidazole; MOR, morphine; NAP, naproxen; NDZP, nordiazepam; NTI, nortriptyline; NVER, norverapamil; PBB, phenobarbital; PCT, paracetamol; PRI, primidone; PXC, piroxicam; SAL, salicylic acid; TIA, tiapride; TCP, ticlopidine; THC, cannabinoids; TFS, triflusal; TPL, sodium thiopental; VER, verapamil. N/A: Not Available.

| <b>Gene</b>  | <b>Gene name</b>                         | <b>Taqman assay ID</b> |
|--------------|------------------------------------------|------------------------|
| <b>TACR3</b> | Tachykinin receptor 3                    | Hs00357277_m1          |
| <b>GAPDH</b> | Glyceraldehyde 3-phosphate dehydrogenase | Hs99999905_m1          |
| <b>RPS13</b> | Ribosomal protein S13                    | Hs01945436_u1          |

**Table S5. Taqman® assays used in qPCR experiments in postmortem human brain.**

The following table contains the Taqman® probes used to target the above-mentioned human genes.

| <b><i>TAC3R</i> rs2765 genotype</b> |          |           |                   |
|-------------------------------------|----------|-----------|-------------------|
|                                     | <b>n</b> | <b>AA</b> | <b>G carriers</b> |
| <b>Total</b>                        | 130      | 49        | 81                |
| <b>Men</b>                          | 33       | 10        | 23                |
| <b>Women</b>                        | 97       | 39        | 58                |

**Table S6. *TAC3R* SNP rs2765 genotype frequency for the human fear conditioning experiment.**

Distribution of genotype frequencies for the SNP rs2765 in the *TAC3R* in the sample among men and women.



|                                         | AA<br>(n = 49) |   |      | G carriers<br>(n = 81) |   |      | P     |
|-----------------------------------------|----------------|---|------|------------------------|---|------|-------|
| Age (years)                             | 23.00          | ± | 4.00 | 23.60                  | ± | 4.90 | 0.455 |
| Sex (n, %)                              | 39 (79.6)      |   |      | 58 (71.6)              |   |      | 0.406 |
| STAI-T                                  | 21.10          | ± | 9.50 | 21.90                  | ± | 9.20 | 0.656 |
| US calibration trials (n)               | 4.00           | ± | 1.40 | 4.40                   | ± | 1.60 | 0.202 |
| US intensity (mA)                       | 3.90           | ± | 1.30 | 3.90                   | ± | 1.40 | 0.361 |
| US discomfort (0-9)                     | 7.20           | ± | 0.70 | 7.00                   | ± | 0.70 | 0.273 |
| Startle probe discomfort (0-9)          | 7.00           | ± | 1.50 | 7.00                   | ± | 1.70 | 0.837 |
| Contingency aware individuals<br>(n, %) | 46 (93.9)      |   |      | 78(96.3)               |   |      | 0.672 |

**Table S7. Participant's characteristics in the human fear conditioning experiment.**

Data are presented as mean  $\pm$  SD or number of subjects and percentage (n, %). STAI-T: trait section from the Spanish Version of the Trait Anxiety Inventory (range 0 to 60), US: unconditioned stimulus. Discomfort ratings ranged from 0 (no discomfort) to 9 (maximum discomfort). t-tests, Mann-Whitney's U test or  $\chi^2$  test were used when appropriate.

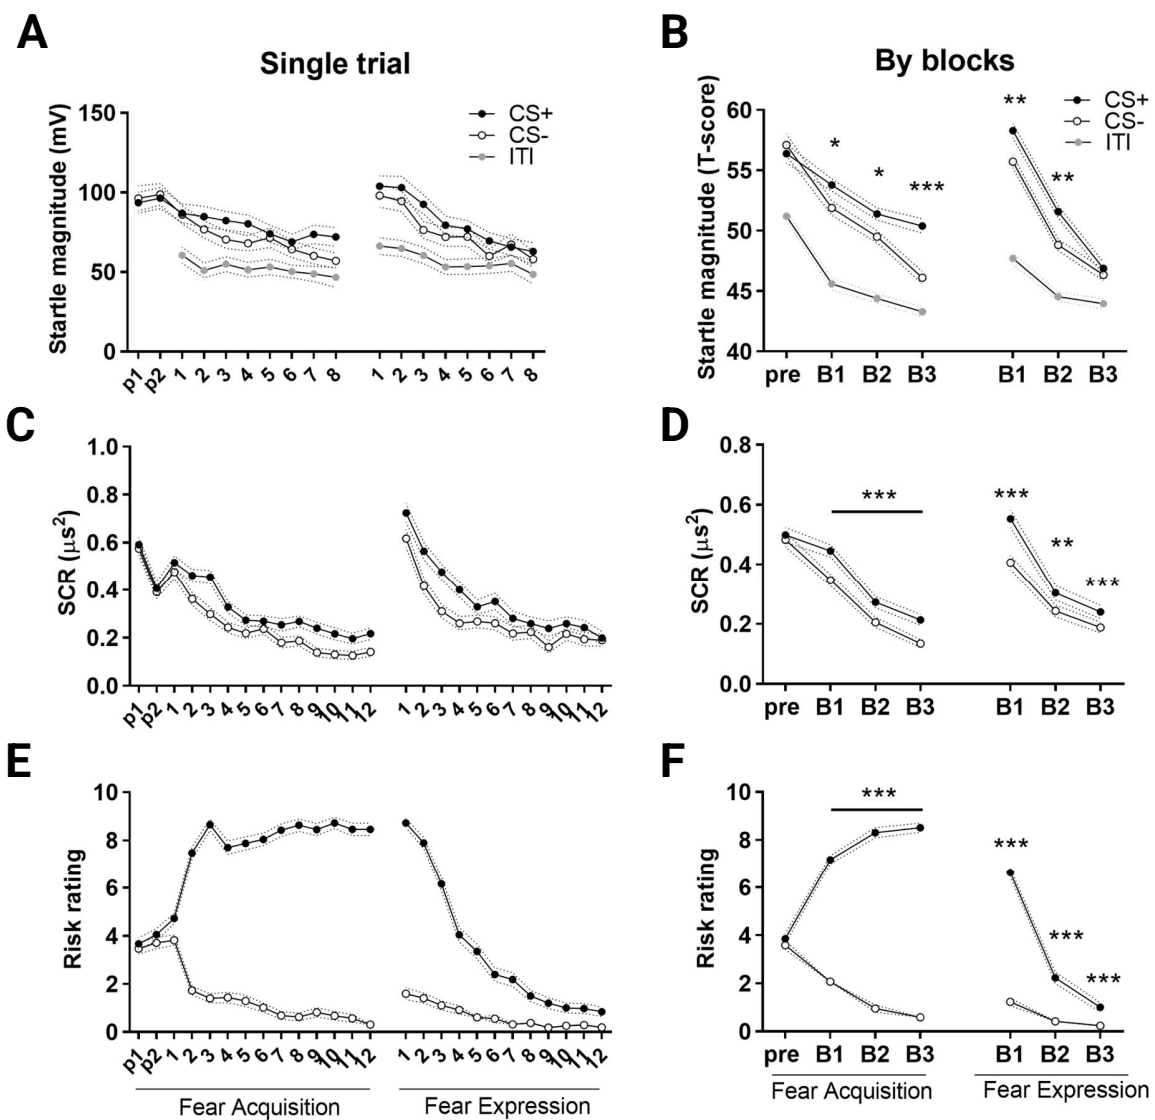

**Fig. S7. Fear acquisition and fear expression in the human sample.**

(A,B) Depicted are the FPS magnitudes (mV and T-score), (C,D) SCR ( $\mu\text{s}^2$ ) and subjective risk ratings (E-F) elicited during the FC-FE task for all participants. Results are shown for all trials (left panels) and by blocks (right panels). B1,B2,B3: block, CS+: reinforced CS, CS-: non-reinforced CS, ITI: startle probe during inter-trial interval, p1: pre-acquisition trial 1, p2: pre-acquisition trial 2, pre: acquisition trials. Data were analyzed using Repeated measures ANOVA. Data are shown as Mean  $\pm$  SEM. \* $p < 0.05$ ; \*\*  $p < 0.01$ ; \*\*\*  $p < 0.001$ .

SNP rs2765 *TAC3R*

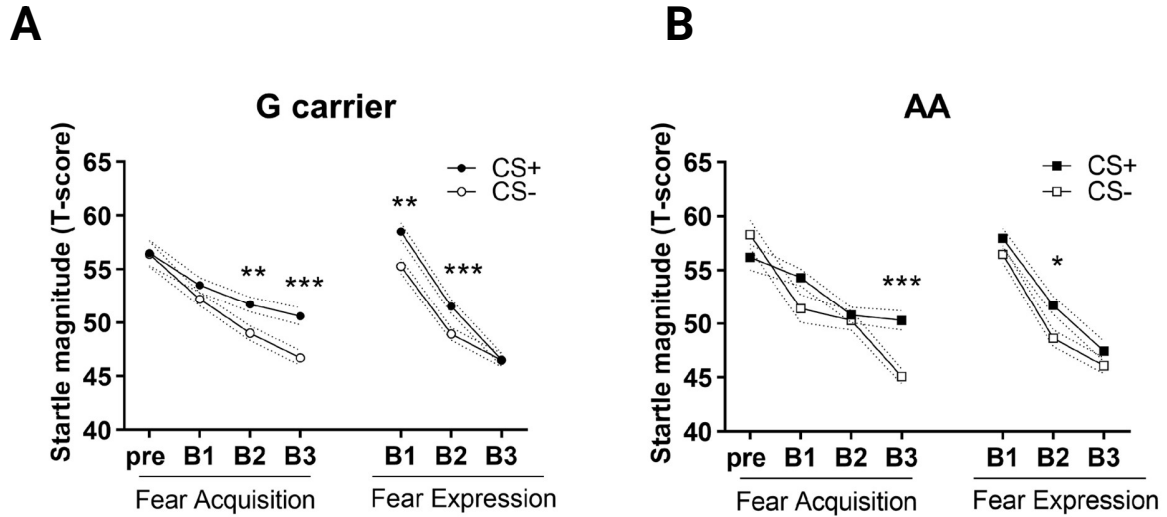

**Fig. S8. Fear potentiated startle: fear acquisition and expression according to genotype.**

G carrier subjects are shown in the left panel (A) and AA subjects in the right panel (B). B1,B2,B3: block, CS+: reinforced CS, CS-: non-reinforced CS, pre: pre-acquisition phase. Asterisks above a bar indicate main effect stimulus. \* Indicates CS discrimination (i.e., higher responses to CS+>CS-). Data were analyzed using Repeated measures ANOVA. Data are shown as Mean  $\pm$  SEM. \* =  $p < 0.05$ , \*\* =  $p < 0.01$ , \*\*\* =  $p < 0.001$ .

SNP rs2765 *TAC3R*

## SCR

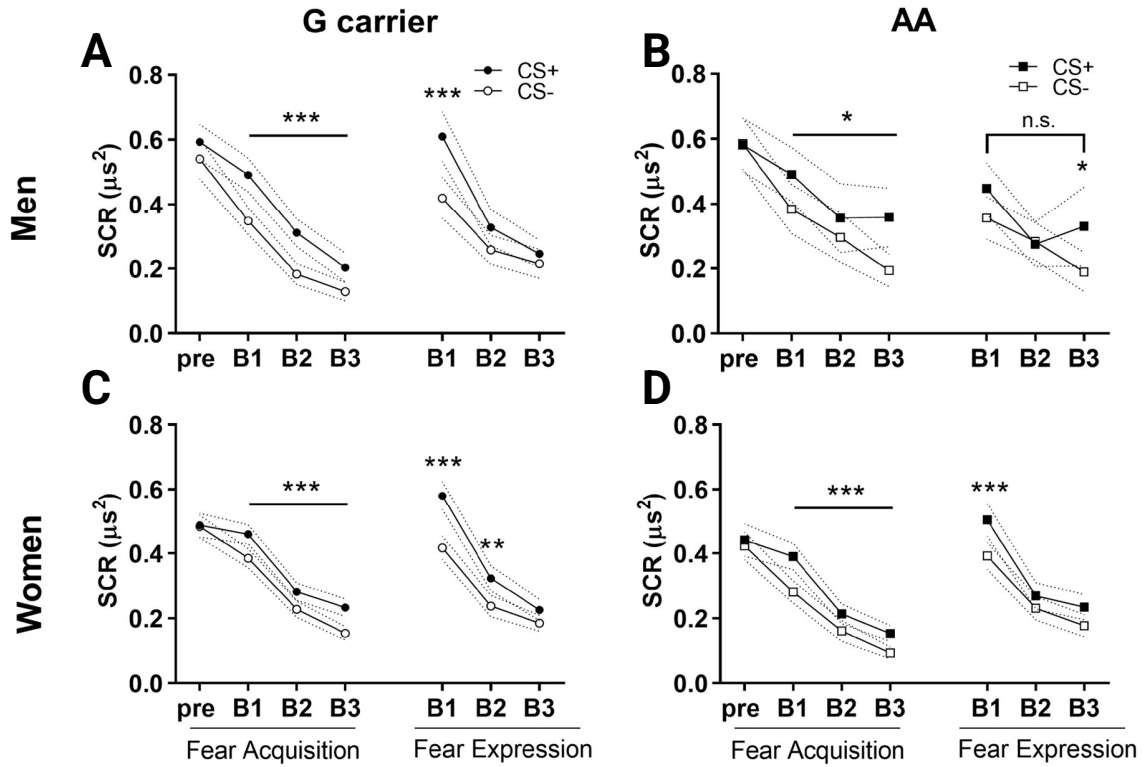

**Fig. S9. Skin conductance response: fear acquisition and expression according to genotype and sex.**

Men are shown in the upper panels G carriers (A) and AA genotype (B). Women are shown in the lower panels G carriers (C) and AA genotype (D). B1, B2, B3: block, CS+: reinforced CS, CS-: non-reinforced CS, pre: pre-acquisition trials. Asterisks above a bar indicate main effect stimulus. \* Indicates CS discrimination (i.e., higher responses to CS+>CS-). Data were analyzed using Repeated measures ANOVA. Data are shown as Mean  $\pm$  SEM. \* =  $p < 0.05$ , \*\* =  $p < 0.01$ , \*\*\* =  $p < 0.001$ .

# RR

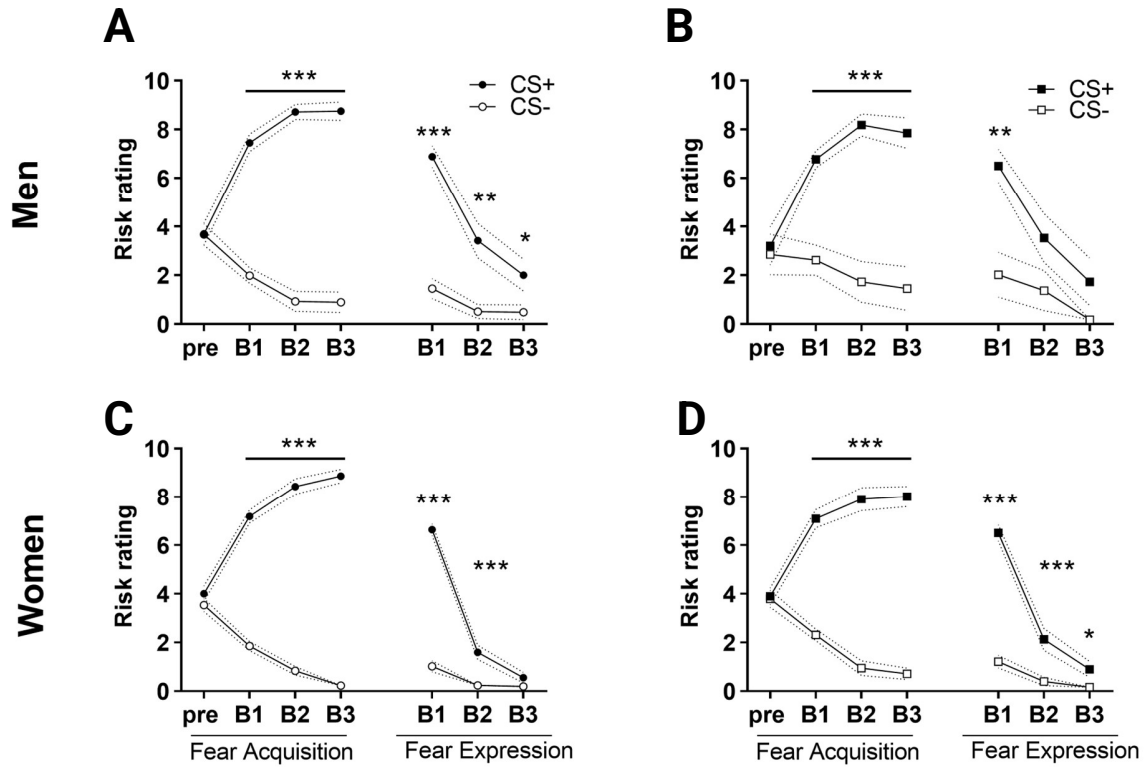

**Fig. S10. Subjective risk ratings (RR): fear acquisition and expression according to genotype and sex.**

Men are shown in the upper panels G carriers (**A**) and AA genotype (**B**). Women are shown in the lower panels G carriers (**C**) and AA genotype (**D**). B1,B2,B3: block, CS+: reinforced CS, CS-: non-reinforced CS, pre: pre-acquisition trials. Asterisks above a bar indicate main effect stimulus. \* Indicates CS discrimination (i.e., higher responses to CS+>CS-). Data were analyzed using Repeated measures ANOVA. Data are shown as Mean  $\pm$  SEM. \* =  $p < 0.05$ , \*\* =  $p < 0.01$ , \*\*\* =  $p < 0.001$ .



**Data S1. Statistics file.**

**Movie S1. Fluorescence of a calcium imaging recording.**
